# Supplementary material for: Pest consumption in a vineyard system by the lesser horseshoe bat (Rhinolophus hipposideros)
Source: PLoS One. 2019 Jul 18;14(7):e0219265. doi: 10.1371/journal.pone.0219265 (PMC6638854; doi:10.1371/journal.pone.0219265)
Supplement: S2 Table — (XLSX) [file pone.0219265.s004.xlsx]

## Sheet: Gillet
List of arthropod prey identified within R. hipposideros faecal pellets with Gillet primers.
Order	Family	Species	Sequence Similarity (%)	ZOTU ID
Araneae	Anyphaenidae	Anyphaena sabina	100	1289
	Araneidae	Araneus diadematus	100	1491
		Araniella cucurbitina	100	1032; 1270
	Eutichuridae	Cheiracanthium mildei	100	739
	Theridiidae	Anelosimus vittatus	100	390
		Episinus maculipes	100	497
Blattodea	Ectobiidae	Ectobius pallidus	100	576
Coleoptera	Bostrichidae	Scobicia chevrieri	100	1027
	Carabidae	Amara apricaria	100	665
	Ptinidae	Ptinus lichenum	100	215
Diptera	Anisopodidae	Sylvicola sp.	>98.5	1616
	Anthomyiidae	Delia platura**	100	209
	Calliphoridae	Pollenia sp.	>98.5	339
	Ceratopogonidae	Forcipomyia bipunctata	100	345
	Chaoboridae	Chaoborus flavicans	100	406
	Chironomidae	Apsectrotanypus trifascipennis	100	419
		Chironomus sp.	>98.5	1540
		Conchapelopia melanops	100	941
		Kiefferulus sp.	>98.5	470
		Macropelopia notata	100	903
		Macropelopia sp.	>98.5	1132
		Microtendipes sp.	>98.5	335
		Paratanytarsus dissimilis	100	527
		Polypedilum albicorne	100	662; 1065
		Polypedilum pedestre	100	1632
		Stenochironomus gibbus	98.67	1543
		Tanytarsus ejuncidus	100	337
		Tanytarsus eminulus	100	883
		Tanytarsus heusdensis	99.24	1562
	Culicidae	Aedes vexans	100	1706
		Anopheles claviger	100	763
		Anopheles sp.	>98.5	1090
		Coquillettidia richiardii	100	240; 589; 599
		Culex hortensis	100	1048
		Culex sp.	>98.5	51; 708
		Culiseta longiareolata	100	737
		Culiseta sp.	>98.5	407; 1342
	Drosophilidae	Drosophila suzukii**	100	18
	Fanniidae	Fannia sp.	>98.5	56
	Hybotidae	Platypalpus sp. 5	100	271
	Keroplatidae	Macrocera centralis	99.24	1122
		Macrocera phalerata	100	186
	Lauxaniidae	Calliopum aeneum	100	839
	Limoniidae	Atypophthalmus inustus	100	726
		Austrolimnophila ochracea	100	13
		Dicranomyia sp. BOLD:ABU9992	100	57
		Dicranomyia sp. BOLD:ACR3244	99.24	184
		Dicranomyia ventralis	99.24	249
		Limonia nubeculosa	100	9
		Molophilus sp.	>98.5	631
		Ormosia sp.	>98.5	1001; 1557
		Rhipidia maculata	100	147; 529
		Symplecta stictica	100	40
	Muscidae	Phaonia rufipalpis	100	647
		Phaonia subventa	100	848
	Mycetophilidae	Leia bimaculata	100	469
		Mycetophila alea	100	625
		Mycetophila sp.	>98.5	435
		Sciophila sp.	>98.5	245
	Phoridae	Megaselia rufipes	100	33
		Megasiella sp.	>98.5	43
	Psychodidae	Paramormia ustulata	99.24	93
		Psychoda alternata	100	66; 262; 274
		Psychoda cinerea	100	72
		Psychoda erminea	100	1000; 1168
		Psychoda lobata	100	21
		Psychoda cf. satchelli	99.22	887
		Psychoda sp.	100	7; 261; 916
	Rhiniidae	Stomorhina lunata	100	484
	Sciaridae	Bradysia trivittata	99.24	479
	Tachinidae	Campylocheta inepta	100	1215
		Compsilura concinnata	100	747; 926; 1055
		Eloceria delecta	100	1015
		Nemoraea pellucida	100	35
		Pales pavida	100	465
		Phryno vetula	100	388
		Triarthria setipennis	100	217
	Tipulidae	Nephrotoma analis	100	221
		Nephrotoma flavescens	99.24	265; 913
		Nephrotoma scalaris	99.24	16
		Tipula fulvipennis	100	1175
		Tipula helvola	100	19
		Tipula lunata	100	852; 1482
		Tipula maxima	100	1603
		Tipula paludosa**	100	330
		Tipula sp.	>98.5	41; 47; 128; 200; 220; 323; 325; 351; 374; 501; 517; 607; 635; 832; 837; 895; 1238; 1355; 1555
	Ulidiidae	Myennis octopunctata	100	805
	Xylomyidae	Solva marginata	100	1133
Ephemeroptera	Caenidae	Caenis luctuosa	100	3; 52
	Ephemeridae	Ephemera glaucops	100	10
	Hemerobiidae	Hemerobius micans	100	417
	Leptophlebiidae	Choroterpes picteti	99.24	20; 37; 48; 63;
	Polymitarcyidae	Ephoron virgo	100	29
	Potamanthidae	Potamanthus luteus	98.99	53
Hemiptera	Aphrophoridae	Philaenus spumarius*	100	583
	Cicadellidae	Fieberiella florii**	100	1367
		Macustus grisescens	100	1681
		Macustus sp.	>98.5	828
		Psammotettix confinis	100	103
		Thamnotettix dilutior	100	532; 1110; 1448
	Miridae	Adelphocoris lineolatus**	100	506
		Adelphocoris sp.	>98.5	674; 922
		Lygus sp.	>98.5	885; 1162
		Melanotrichus virescens	100	1214
Hymenoptera	Braconidae	Aleiodes sp.	>98.5	1619
		Psyttalia carinata	100	1354
	Ichneumonidae	Gelis liparae	100	1143
		Mesochorus coronatus	99.04	1197
		Pristomerus vulnerator	100	341
		Thaumatogelis lichtensteini	100	1382
	Perilampidae	Perilampus tristis	100	512
Lepidoptera	Adelidae	Nematopogon schwarziellus	100	1224
	Alucitidae	Alucita hexadactyla	100	229
	Argyresthiidae	Argyresthia abdominalis*	100	1010
		Argyresthia goedartella	100	762; 1067; 1564; 1637
		Argyresthia sorbiella*	100	1385
		Argyresthia spinosella*	100	322; 604; 628; 829
	Autostichidae	Oegoconia caradjai	100	1633
		Stibaromacha ratella	100	285
		Symmoca signatella	100	1073
	Batrachedridae	Batrachedra praeangusta	100	326; 813
	Bedellidae	Bedellia somnulentella*	100	120; 675
		Bedellia sp.	>98.5	321
	Blastobasidae	Blastobasis glandulella	100	1243
		Blastobasis phycidella	100	34; 59; 900; 1061
	Coleophoridae	Coleophora bilineatella	100	994
		Coleophora bilineella	100	1565
		Coleophora centaureivora	100	131
		Coleophora glaucicolella	100	1058
		Coleophora helichrysiella	100	618
		Coleophora lineata	100	1139
		Coleophora sp.	>98.5	91;149;211;269;273;405;498;573;727;1137;1219;1322;1475;1545;1624;1668
		Coleophora staehelinella	99.24	370
	Cosmopterigidae	Pyroderces argyrogrammos	100	109;111;139;286
	Crambidae	Agriphila geniculea	100	1141
		Agriphila sp.	>98.5	794
		Catoptria pinella	100	1486
		Eudonia mercurella	100	134
		Eudonia petrophila	100	1431
		Metasia ophialis	100	809
		Pediasia aridella	100	1449
		Pediasia contaminella	99.22	1518
		Udea ferrugalis*	100	1472
	Depressariidae	Agonopterix scopariella	100	461
		Agonopterix sp.	>98.5	216; 578
		Agonopterix subpropinquella	100	846
		Depressaria sp.	>98.5	1037
		Luquetia lobella	100	892
	Elachistidae	Elachista nr. collitella	100	202
		Haplochrois buvati	100	396
		Heinemannia festivella	100	416; 667
	Epermeniidae	Ochromolopis ictella	100	1255
	Erebidae	Coscinia cribraria	99.24	177
		Cymbalophora pudica	100	150
		Lygephila sp.	>98.5	1252
	Gelechiidae	Acompsia cinerella	100	1283
		Anacampsis populella*	100	621
		Aproaerema anthyllidella	100	70;682;1710
		Aproaerema patruella	100	745
		Aristotelia sp.1	100	132; 293
		Bryotropha terrella	100	300; 936
		Dichomeris alacella	100	167
		Epidola stigma	100	304; 502
		Eulamprotes immaculatella	99.24	344
		Exoteleia dodecella**	100	1389
		Gelechia basipunctella	100	433
		gelechia sabinella	100	1627
		Gelechia scotinella	100	1177; 1206; 1246; 1623
		Helcystogramma lutatella	100	142; 369; 421
		Isophrictis kefersteiniellus	100	1022
		Megacraspedus quadristictus	100	1239
		Mesophleps corsicella	100	1202
		Mesophleps ochracella	100	98
		Mesophleps oxycedrella	100	761
		Metzneria hilarella	100	71; 230
		Metzneria metzneriella	99.24	235
		Mirificarma mulinella	100	1241
		Neofaculta ericetella	100	1474
		Nothris verbascella	100	73
		Ptocheuusa inopella	99.24	441
		Ptocheuusa paupella	100	515
		Recurvaria leucatella*	100	488; 518
		Recurvaria nanella**	99.24	605
		Scrobipalpa acuminatella	100	1376
		Scrobipalpa costella	100	1415
		Scrobipalpa obsoletella	100	917
		Scrobipalpa suaedivorella	100	744
		Scrobipalpa vasconiella	100	950
		Sophronia humerella	99.24	1025
		Telphusa cistiflorella	100	548
		Xenolechia aethiops	100	893
	Geometridae	Aspitates gilvaria	99.22	141; 329; 494
		Aspitates ochrearia	100	198
		Calamodes occitanaria	100	984; 1049
		Compsoptera jourdanaria	99.24	422
		Compsoptera opacaria	100	906; 1447
		Crocallis dardoinaria	100	587
		Gnophos dumetata	100	590
		Idaea consanguiberica	99.24	1323
		Idaea fuscovenosa	100	1253
		Idaea infirmaria	100	679
		Idaea mustelata	100	653; 1338
		Idaea ostrinaria	100	1495
		Idaea sp.	>98.5	181;267;523;844;988;1320;1526
		Isturgia murinaria	100	630
		Pachycnemia hippocastanaria	100	638
		Pachycnemia tibiaria	100	156; 365
		Rhodometra sacraria	100	106;130;146;204;448;511;777
		Scopula submutata	100	1319
		Scotopteryx peribolata	100	1683
		Selidosema pyrenaearia	100	154
		Selidosema taeniolaria	100	125; 290
		Stegania sp.	>98.5	308
		Zernyia granataria	99.24	881
	Glyphipterigidae	Orthotelia sparganella	100	105
	Gracillaridae	Parornix atripalpella	100	695
		Parornix devoniella*	100	1577
		Phyllonorycter endryella	100	779
		Phyllonorycter messaniella*	100	1403
		Phyllonorycter populifoliella	100	945
		Phyllonorycter sp.	>98.5	1554
	Hepialidae	Triodia sylvina	100	2; 61
	Lasiocampidae	Lasiocampa trifolii	100	270; 536
	Lecithoceridae	Eurodachtha canigella	100	126; 305
		Eurodachtha pallicornella	100	145
		Homaloxestis briantiella	100	509; 1033
	Limnephilidae	Glyphotaelius pellucidus	100	77
	Lypusidae	Pseudatemelia flavifrontella	99.24	427; 1077
	Momphidae	Mompha epilobiella	100	751; 1459
		Mompha subbistrigella	100	278
	Nepticulidae	Stigmella eberhardi	100	543; 1248
		Stigmella sp.	>98.5	977
	Noctuidae	Agrotis trux	100	598
		Euxoa sp.	>98.5	28
		Hoplodrina octogenaria	98.67	83
		Lycophotia erythrina	100	445
		Noctua sp.	>98.5	118
		Peridroma saucia**	100	22
		Spodoptera exigua**	100	1386
		Stilbia andalusiaca	99.24	376
		Thalpophila sp.	>98.5	276
		Xestia xanthographa	100	298
	Notodontidae	Thaumetopoea pityocampa**	100	307
	Oecophoridae	Batia lunaris	100	1381
		Crassa unitella	100	549
		Pleurota aristella	100	207; 1618
		Pleurota honorella	99.24	923
	Oeocophoridae	Oecophora bractella*	100	1079
	Plutellidae	Plutella xylostella**	100	60
	Praydidae	Prays oleae**	100	157
	Psychidae	Eumasia parietariella	100	1151
	Pterophoridae	Agdistis sp.	>98.5	178
		Cnaemidophorus rhododactyla	100	1330
		Emmelina monodactyla	100	5; 452; 1407
		Merrifieldia garrigae	100	580
		Pterophorus pentadactyla	99.24	87
		Stenoptilia mariaeluisae	100	26
		Stenoptilia mimula	100	65; 184
		Stenoptilia sp.	>98.5	642
		Stenoptilia zophodactyla	100	282; 1004
	Pyralidae	Acrobasis marmorea	100	1647
		Asalebria florella	99.22	1516
		Ematheudes punctellus	100	399; 709; 1546
		Endotricha flammealis	100	45
		Ephestia parasitella**	100	981
		Ephestia sp.	>98.5	693
		Oxybia transversella	100	1002; 1438
		Phycitodes saxicola	100	823
		Synaphe punctalis	100	281;380;611;749;955
	Scythrididae	Scythris sp.	>98.5	962
	Tineidae	Ateliotum petrinella	100	1014
		Infurcitinea atrifasciella	100	1098
		Monopis crocicapitella	100	425
		Morophaga choragella	100	318; 817; 1601
		Tenaga rhenania	100	1261
	Tischeridae	Coptotriche marginea	100	1152
		Tischeria ekebladella*	100	1274
	Tortricidae	Acleris schalleriana*	100	381
		Acleris variegana**	100	187
		Aethes bilbaensis	100	234
		Aethes sp.	>98.5	429
		Aethes williana	99.24	1466
		Agapeta sp.	>98.5	212; 529
		Aleimma loeflingiana*	100	250
		Ancylis achatana*	100	439; 753; 951
		Archips podana**	100	1172
		Archips rosana*	100	268; 503; 624
		Clepsis consimilana*	100	1172
		Cnephasia incertana*	100	108
		Cnephasia sp.	>98.5	1589
		Cochylimorpha meridiana	100	148
		Cochylis hybridella	99.24	704; 795; 1226; 1643
		Cochylis molliculana	100	483
		Cochylis posterana	100	1599
		Crocidosema plebejana	100	62
		Cydia amplana	100	85
		Cydia fagiglandana*	100	31; 46; 95
		Cydia pomonella**	100	1209
		Cydia sp.	>98.5	32; 336
		Cydia splendana*	100	15; 25
		Diceratura infantana	99.24	162
		Epinotia thapsiana	100	84
		Epinotia nisella	100	295
		Eucosma balatonana	100	171
		Eucosma cana	100	102
		Gypsonoma aceriana**	100	14
		Hedya nubiferana*	100	613
		Hedya pruniana*	100	555
		Isotrias stramentana	100	1455
		Lobesia botrana**	100	715
		Lozotaenia cupidinana	100	680
		Notocelia incarnatana	100	990
		Notocelia roborana	100	867
		Notocelia uddmanniana**	100	1260
		Orthotaenia undulana*	100	768; 1303
		Paramesia gnomana	100	302
		Pelochrista mollitana	100	668
		Phalonidia contractana	100	160
		Pseudargyrotoza conwagana	100	116; 263
		Rhyacionia buoliana**	100	1097
		Rhyacionia pinicolana*	100	1272
		Sparganothis pilleriana**	100	39; 100;
		Zeiraphera isertana	100	378
	Yponomeutidae	Cedestis subfasciella	100	1043
		Paraswammerdamia albicapitella	100	331; 1361
	Ypsolophidae	Ypsolopha scabrella*	100	275; 1167
Neuroptera	Chrysopidae	Chrysopa dorsalis	100	1592
		Chrysopa viridana	100	1070
		Chrysoperla sp.	>98.5	99; 277
		Nothochrysa capitata	100	959
		Pseudomallada sp.	>98.5	566; 785; 1421
	Hemerobiidae	Hemerobius lutescens	100	719
		Hemerobius micans	100	417; 1113
		Hemerobius sp.	>98.5	491; 760; 940
		Sympherobius klapaleki	100	1334
		Sympherobius pygmaeus	100	434; 734; 897
Plecoptera	Leuctridae	Leuctra sp.	>98.5	692; 791
	Nemouridae	Protonemura nitida	99.24	1559
Trichoptera	Hydropsychidae	Hydropsyche bulbifera	100	865
		Hydropsyche dinarica	100	776; 854; 933; 1157; 1336
		Hydropsyche exocellata	100	49
		Hydropsyche siltalai	100	237
	Hydroptilidae	Hydroptila angulata	100	921
	Lepidostomatidae	Lepidostoma hirtum	99.19	1390; 1682
	Limnephilidae	Limnephilus hirsutus	100	504
		Potamophylax latipennis	99.24	1666
	Psychomyiidae	Psychomyia pusilla	100	430
	Rhyacophilidae	Rhyacophila sp.	>98.5	1485
	* Minor pest species
	** Major pest species
List of non-prey species
Order	Family	Species	Sequence Similarity (%)	ZOTU ID
Chiroptera	Rhinolophidae	Rhinolophus hipposideros	100	1; 6
Eurotiales	Trichocomaceae	Penicillium brevicompactum	100	1539
Ixodida	Argasidae	Carios vespertilionis	100	179
Mesostigmata	Melicharidae	Proctolaelaps scolyti	100	606
Mucorales	Lichtheimiaceae	Lichtheimia ramosa	100	86
Rickettsiales	Rickettsiaceae	Wolbachia sp.	100	995
Rodentia	Muridae	Rattus sp.	>98.5	206
Sarcoptiformes	Micreremidae	Micreremus brevipes	100	1277

## Sheet: Zeale
List of arthropod prey identified within R. hipposideros faecal pellets with Zeale primers.
Order	Family	Species	Sequence Similarity (%)	ZOTU ID
Araneae	Anyphaenidae	Anyphaena sabina	100	710
Blattodea	Ectobiidae	Ectobius pallidus	100	633
Coleoptera	Carabidae	Ophonus ardosiacus	100	147
	Curculionidae	Curculio glandium**	100	930
Diptera	Anisopodidae	Sylvicola sp.	>98.5	281; 476; 619; 914
	Anthomyiidae	Delia platura**	100	205
	Chaoboridae	Chaoborus flavicans	100	358
	Chironomidae	Conchapelopia melanops	100	247
		Polypedilum scalaenum	98.72	324
		Tvetenia calvescens	100	421; 831
		Zavrelimyia sp.	>98.5	495
	Chloropidae	Thaumatomyia sp. BOLD:ACQ9264	100	115
	Culicidae	Anopheles claviger	100	694
		Anopheles sp.	>98.5	739
		Anopheles goeldii	100	108
		Coquillettidia richiardii	100	393
		Culex pipiens	100	10
		Culiseta longiareolata	100	303
		Culiseta sp.	>98.5	441
	Drosophilidae	Drosophila subobscura	100	751
		Drosophila suzukii**	100	19
	Fanniidae	Fannia sp.	>98.5	114
	Keroplatidae	Macrocera phalerata	100	236
	Lauxaniidae	Minettia lupulina	100	673
	Limoniidae	Atypophthalmus inustus	100	198
		Austrolimnophila ochracea	100	188
		Dicranomyia sp. BOLD:ABU9992	100	265
		Dicranomyia sp. BOLD:ACR3244	99.36	175
		Limonia nubeculosa	100	5; 54; 104; 1051
		Rhipidia maculata	100	158
		Symplecta stictica	100	45
		Symplecta pilipes	99.36	209
	Muscidae	Phaonia subventa	100	515
		Stomoxys calcitrans	98.72	1083
	Mycetophilidae	Mycetophila sp.	>98.5	904
	Pediciidae	Ula mollissima	100	37
		Ula sylvatica	100	642
	Phoridae	Megaselia sp.	>98.5	14
	Psychodidae	Paramormia ustulata	99.36	47
		Psychoda albipennis	100	31
		Psychoda alternata	100	528
		Psychoda erminea	100	196; 268; 366; 395
		Psychoda lobata	100	75
		Psychoda cf. satchelli	100	298
	Rhiniidae	Stomorhina lunata	100	948
	Sciaridae	Bradysia longicubitalis	100	1061
	Stratiomyidae	Pachygaster sp.	>98.5	443
	Syrphidae	Toxomerus sp.	>98.5	437
	Tachinidae	Campylocheta praecox	98.69	625
		Eloceria delecta	100	830
		Pales pavida	100	35
		Phryno vetula	100	15
		Triarthria setipennis	100	1052
	Tephritidae	Tephritis sp.	>98.5	902
	Tipulidae	Nephrotoma scalaris	99.36	20
		Tipula helvola	100	124; 928
		Tipula lateralis	100	73
		Tipula magnicauda	98.72	457
		Tipula oleracea*	99.36	32
		Tipula peliostigma	99.36	708; 747
		Tipula scripta	100	502; 804
		Tipula sp.	>98.5	132
	Ulidiidae	Myennis octopunctata	100	468
Ephemeroptera	Caenidae	Caenis luctuosa	100	1036
		Caenis pusilla	100	111
	Ephemeridae	Ephemera glaucops	100	126
	Leptophlebiidae	Choroterpes picteti	100	9; 16; 28; 44; 46; 129
	Polymitarcyidae	Ephoron virgo	100	2; 99
	Potamanthidae	Potamanthus luteus	99.31	40
Hemiptera	Miridae	Lygus sp.	>98.5	305
Hymenoptera	Ichneumonidae	Pristomerus vulnerator	100	525
Lepidoptera	Alucitidae	Alucita hexadactyla	100	78
	Argyresthiidae	Argyresthia spinosella	100	102; 396
	Autostichidae	Dysspastus fallax	99.36	946
		Oegoconia sp.	>98.5	466
		Stibaromacha ratella	100	1063
		Symmoca signatella	100	284
	Batrachedridae	Batrachedra praeangusta	100	344
	Bedelliidae	Bedellia somnulentella*	100	364; 631; 813; 940; 997
	Blastobasidae	Blastobasis glandulella	100	365
		Blastobasis phycidella	100	3
	Coleophoridae	Coleophora adspersella	100	66
		Coleophora medelichensis	100	555
		Coleophora bilineatella	100	109
		Coleophora centaureivora	100	571; 1005
		Coleophora congeriella	100	352
		Coleophora cyrniella	100	894
		Coleophora helichrysiella	100	224
		Coleophora involucrella	100	937
		Coleophora ochrea	99.36	719
		Coleophora oriolella	100	244
		Coleophora santolinella	99.36	496
		Coleophora sisteronica	100	329; 522; 862
		Coleophora sp.	>98.5	120;246;526;691;705;724;777;949;1000
		Coleophora striolatella	99.36	267
		Coleophora trigeminella	100	666
		Coleophora vestianella	100	450
		Coleophora wockeella	98.72	1006
	Cosmopterigidae	Limnaecia phragmitella	100	107
		Pyroderces argyrogrammos	100	29;50;71;72
	Crambidae	Agriphila geniculea	100	590
		Eudonia lacustrata	100	989
		Metasia ophialis	99.36	684
		Pediasia contaminella	100	153; 459
		Pyrausta despicata	100	255
		Udea ferrugalis*	100	311
	Depressariidae	Agonopterix cnicella	100	292
		Agonopterix heracliana	99.36	411
		Agonopterix nervosa	100	925
		Agonopterix subpropinquella	100	372
		Depressaria albipunctella	100	916
	Elachistidae	Elachista argentella	100	539
		Elachista nr. collitella	100	485
		Elachista nuraghella	98.72	1070
		Elachista sp.	>98.5	927; 968
		Heinemannia festivella	99.36	235; 390; 506
	Epermeniidae	Epermenia pontificella	100	1066
	Erebidae	Calliteara pudibunda*	100	616
		Cymbalophora pudica	100	967
		Eublemma purpurina	99.21	80; 275
		Ocneria rubea	100	386
	Gelechiidae	Aroga pascuicola	100	1418
		Nothris verbascella	100	297
		Acompsia cinerella	99.36	1056
		Anacampsis populella*	100	202
		Aproaerema anthyllidella	100	64;118;438;467
		Aproaerema suecicella	100	573
		Bryotropha terrella	100	288; 1016
		Bryotropha vondermuhlli	100	479
		Epidola stigma	100	205;333;505
		Eulamprotes immaculatella	99.36	423
		Exoteleia dodecella**	100	606
		Gelechia sabinella	100	374
		Gelechia turpella	100	42; 51
		Isophrictis kefersteiniellus	100	781
		Isophrictis lineatella	100	90; 137
		Megacraspedus lanceolellus	99.36	699; 713;
		Megacraspedus quadristictus	100	389; 1050; 1038
		Metzneria aestivella	100	993
		Metzneria hilarella	100	22
		Metzneria metzneriella	99.36	445
		Metzneria neuropterella	100	568; 1076
		Nothris verbascella	100	297; 701
		Phthorimaea operculella**	100	488
		Recurvaria leucatella*	100	306; 312; 574
		Scrobipalpa acuminatella	100	310
		Scrobipalpa obsoletella	100	856; 1077
		Scrobipalpa portosanctana	100	119
		Scrobipalpa sp.	>98.5	1055
		Scrobipalpa suaedivorella	100	514
		Scrobipalpa vasconiella	100	167
		Telphusa cistiflorella	100	283
		Xenolechia aethiops	100	252
	Geometridae	Aspitates gilvaria	100	98; 162
		Aspitates ochrearia	100	220
		Calamodes occitanaria	100	248
		Camptogramma bilineata	100	68
		Charissa obscurata	100	431
		Charissa sp.	>98.5	849
		Compsoptera jourdanaria	100	475
		Compsoptera opacaria	100	200; 787
		Crocallis dardoinaria	100	602; 687
		Cyclophora sp.	>98.5	975
		Hospitalia flavolineata	100	359
		Idaea fuscovenosa	100	424; 1059; 1072
		Idaea infirmaria	99.36	105
		Idaea laevigata	100	647
		Idaea mustelata	100	116
		Idaea sp.	>98.5	532;544;614;742
		Pachycnemia hippocastanaria	100	429
		Peribatodes sp.	>98.5	385
		Rhodometra sacraria	100	17;34;41;77;237
		Scopula submutata	100	402
		Scotopteryx peribolataJG01Mo	100	223
		Selidosema pyrenaearia	100	127
		Selidosema taeniolaria	100	21
		Xanthorhoe ferrugata	100	464
		Zernyia granataria	99.36	131
	Gracillariidae	Parornix szocsi	99.36	818; 838
	Hepialidae	Triodia sylvina	100	61; 677
	Lasiocampidae	Lasiocampa trifolii	100	79; 135; 194
	Lecithoceridae	Eurodachtha pallicornella	100	1008
	Lypusidae	Pseudatemelia flavifrontella	99.36	551
	Momphidae	Mompha epilobiella	100	242
		Mompha subbistrigella	100	92; 238
	Noctuidae	Agrotis sp.	>98.5	146; 348; 543; 945; 1035
		Hadena luteocincta	98.7	214
		Lycophotia erythrina	100	956
		Mythimna unipuncta**	100	207
		Noctua sp.	>98.5	48
		Peridroma saucia**	100	12
		Raphia hybris	100	95
	Notodontidae	Thaumetopoea pityocampa**	100	516
	Nymphalidae	Pyronia tithonus	100	430; 808
	Plutellidae	Plutella xylostella**	100	672; 1053
	Praydidae	Prays oleae**	100	74
		Prays sp.	>98.5	935
	Pterophoridae	Calyciphora adamas	98.72	38
		Merrifieldia baliodactylus	100	427
		Merrifieldia garrigae	100	566
		Pterophorus pentadactyla	99.36	143
		Stenoptilia mimula	100	524
		Stenoptilia zophodactyla	100	96
		Stenoptilia sp.	>98.5	564
		Wheeleria spilodactylus	99.36	835
	Pyralidae	Acrobasis advenella	100	346
		Acrobasis marmorea	100	251; 750
		Acrobasis porphyrella	100	676; 758
		Actenia borgialis	98.69	775
		Ancylosis oblitella	100	1046
		Ematheudes punctellus	100	112; 178
		Endotricha flammealis	100	262
		Ephestia parasitella**	100	330; 355; 649; 678
		Homoeosoma sinuella	100	523; 597
		Oxybia transversella	100	369; 534
		Phycita sp.	>98.5	469
		Synaphe punctalis	100	222;368;425;503;641;652
	Tineidae	Infurcitinea atrifasciella	100	304; 473; 572
		Morophaga choragella	100	240; 413
		Nemapogon nevadella	100	259; 463
		Nemapogon peslieri	100	636
		Nemapogon ruricolella	99.36	939
	Tischeriidae	Coptotriche angusticollella	100	453
		Coptotriche marginea	100	341
		Tischeria ekebladella*	100	714
	Tortricidae	Acleris forsskaleana	100	911
		Acleris schalleriana*	100	53
		Acleris variegana**	100	881
		Aethes sp.	>98.5	382
		Agapeta sp.	>98.5	69
		Aleimma loeflingiana*	100	141; 286
		Ancylis achatana*	100	159; 216
		Archips rosana*	100	155; 391; 712
		Cnephasia incertana*	100	59
		Cnephasia sp.	>98.5	553
		Cochylimorpha meridiana	99.36	33
		Cochylis hybridella	99.36	212
		Cochylis molliculana	100	103
		Cydia amplana	100	663
		Cydia fagiglandana*	100	52; 63; 165; 282
		Cydia intexta	100	972
		Cydia pomonella**	100	943
		Cydia sp.	>98.5	880
		Cydia splendana*	100	250
		Ditula angustiorana*	100	629
		Endothenis sp.	>98.5	179
		Epinotia nisella	100	376; 891
		Epinotia ramella	100	996
		Epinotia tenerana	100	494
		Eucosma cana	100	55
		Gypsonoma aceriana**	100	4
		Gypsonoma sociana	100	728
		Hedya nubiferana*	100	858
		Hedya ochroleucana*	100	861
		Hedya sp.	>98.5	755; 1025
		Lobesia botrana**	100	266
		Neosphaleroptera nubilana*	100	1080
		Notocelia incarnatana	100	542; 698; 918; 1064
		Notocelia roborana	100	289; 547
		Notocelia uddmanniana**	100	280; 583
		Orthotaenia undulana*	100	191; 477
		Pelochrista mollitana	100	1040
		Pelochrista sp.	>98.5	481
		Phalonidia contractana	100	765
		Pseudargyrotoza conwagana	100	497
		Rhyacionia buoliana**	100	168; 397; 634
		Sparganothis pilleriana**	100	125; 274
		Spilonota ocellana*	100	277; 541; 718; 895
	Yponomeutidae	Paraswammerdamia albicapitella	100	998
	Ypsolophidae	Ypsolopha scabrella*	100	206; 449; 704
Neuroptera	Chrysopidae	Chrysoperla sp.	>98.5	877
		Nothochrysa capitata	100	779
		Pseudomallada sp.	>98.5	253; 422
	Hemerobiidae	Hemerobius humulinus	100	692
		Hemerobius sp.	>98.5	603; 764
		Wesmaelius sp.	>98.5	512
		Sympherobius klapaleki	100	294
Plecoptera	Leuctridae	Leuctra sp.	>98.5	596; 859
Trichoptera	Hydropsychidae	Hydropsyche exocellata	100	837
	Lepidostomatidae	Lepidostoma hirtum	99.35	81
	Limnephilidae	Limnephilus hirsutus	100	815
	Odontoceridae	Odontocerum albicorne	100	291
	Psychomyiidae	Psychomyia pusilla	100	731
		Psychomyia sp.	>98.5	318
	Rhyacophilidae	Rhyacophila sp.	>98.5	264; 388; 537
	* Minor pest species
	** Major pest species
List of non-prey species
Order	Family	Species	Sequence Similarity (%)	ZOTU ID
Trombidiformes	Unionicolidae	Unionicola sp.	99.35	733

## Sheet: Gillet+Zeale
List of arthropod prey identified within R. hipposideros faecal pellets with Gillet and Zeale primers combined
Order	Family	Species	ZOTU ID
Araneae	Anyphaenidae	Anyphaena sabina
	Araneidae	Araneus diadematus
	Eutichuridae	Araniella cucurbitina
		Cheiracanthium mildei
	Theridiidae	Anelosimus vittatus
		Episinus maculipes
Blattodea	Ectobiidae	Ectobius pallidus
Coleoptera	Bostrichidae	Scobicia chevrieri
	Brentidae	Ceratapion gibbirostre
	Carabidae	Amara apricaria
		Ophonus ardosiacus
	Curculionidae	Curculio glandium**
	Ptinidae	Ptinus lichenum
Diptera	Anisopodidae	Sylvicola sp.
	Anthomyiidae	Delia platura**
	Calliphoridae	Pollenia sp.
	Ceratopogonidae	Forcipomyia bipunctata
	Chaoboridae	Chaoborus flavicans
	Chironomidae	Apsectrotanypus trifascipennis
		Chironomus sp.
		Conchapelopia melanops
		Kiefferulus sp.
		Macropelopia notata
		Macropelopia sp.
		Microtendipes sp.
		Paratanytarsus dissimilis
		Polypedilum albicorne
		Polypedilum pedestre
		Polypedilum scalaenum
		Stenochironomus gibbus
		Tanytarsus ejuncidus
		Tanytarsus eminulus
		Tanytarsus heusdensis
		Tvetenia calvescens
		Zavrelimyia nr. barbatipes
	Chloropidae	Thaumatomyia sp. BOLD:ACQ9264
	Culicidae	Aedes vexans
		Anopheles claviger
		Anopheles sp.
		Coquillettidia richiardii
		Culex hortensis
		Culex pipiens
		Culex sp.
		Culiseta longiareolata
		Culiseta sp.
	Drosophilidae	Drosophila subobscura
		Drosophila suzukii**
	Fanniidae	Fannia sp.
	Hybotidae	Platypalpus sp.
	Keroplatidae	Macrocera centralis
		Macrocera phalerata
	Lauxaniidae	Calliopum aeneum
		Minettia lupulina
	Limoniidae	Anopheles goeldii
		Atypophthalmus inustus
		Austrolimnophila ochracea
		Dicranomyia lutea
		Dicranomyia mitis
		Dicranomyia sp. BOLD:ABU9992
		Dicranomyia sp. BOLD:ACR3244
		Dicranomyia ventralis
		Limonia nubeculosa
		Molophilus sp.
		Ormosia sp.
		Rhipidia maculata
		Symplecta pilipes
		Symplecta stictica
	Muscidae	Phaonia subventa
		Phaonia rufipalpis
		Stomoxys calcitrans
	Mycetophilidae	Leia bimaculata
		Mycetophila alea
		Mycetophila sp.
		Sciophila sp.
	Pediciidae	Ula mollissima
		Ula sylvatica
	Phoridae	Megaselia rufipes
		Megaselia sp.
	Psychodidae	Psychoda albipennis
		Psychoda alternata
		Psychoda cinerea
		Psychoda erminea
		Psychoda lobata
		Psychoda satchelli
		Psychoda sp.
	Rhiniidae	Stomorhina lunata
	Sciaridae	Bradysia longicubitalis
		Bradysia trivittata
	Stratiomyidae	Pachygaster sp.
	Syrphidae	Toxomerus sp.
	Tachinidae	Campylocheta inepta
		Campylocheta praecox
		Compsilura concinnata
		Eloceria delecta
		Nemoraea pellucida
		Pales pavida
		Phryno vetula
		Triarthria setipennis
	Tephritidae	Tephritis sp.
	Tipulidae	Limonia nubeculosa
		Nephrotoma analis
		Nephrotoma flavescens
		Nephrotoma scalaris
		Tipula fulvipennis
		Tipula helvola
		Tipula lateralis
		Tipula lunata
		Tipula magnicauda
		Tipula maxima
		Tipula oleracea*
		Tipula paludosa**
		Tipula peliostigma
		Tipula scripta
		Tipula sp.
	Ulidiidae	Myennis octopunctata
	Xylomyidae	Solva marginata
Ephemeroptera	Caenidae	Caenis luctuosa
		Caenis pusilla
	Ephemeridae	Ephemera glaucops
	Geometridae	Rhodometra sacraria
	Hemerobiidae	Hemerobius micans
	Leptophlebiidae	Choroterpes picteti
	Polymitarcyidae	Ephoron virgo
	Potamanthidae	Potamanthus luteus
Hemiptera	Aphrophoridae	Philaenus spumarius*
	Cicadellidae	Empoasca sp.
		Fieberiella florii**
		Macustus grisescens
		Macustus sp.
		Psammotettix confinis
		Thamnotettix dilutior
	Miridae	Adelphocoris lineolatus**
		Adelphocoris sp.
		Lygus sp.
		Melanotrichus virescens
Hymenoptera	Braconidae	Aleiodes sp.
		Psyttalia carinata
Lepidoptera	Adelidae	Nematopogon schwarziellus
	Alucitidae	Alucita hexadactyla
	Argyresthiidae	Argyresthia abdominalis*
		Argyresthia goedartella
		Argyresthia sorbiella*
		Argyresthia spinosella*
	Autostichidae	Dysspastus fallax
		Oegoconia caradjai
		Oegoconia sp.
		Stibaromacha ratella
		Symmoca signatella
	Batrachedridae	Batrachedra praeangusta
	Bedelliidae	Bedellia somnulentella*
		Bedellia sp.
	Blastobasidae	Blastobasis glandulella
		Blastobasis phycidella
	Coleophoridae	Coleophora adspersella
		Coleophora bilineatella
		Coleophora bilineella
		Coleophora centaureivora
		Coleophora congeriella
		Coleophora cyrniella
		Coleophora deauratella
		Coleophora glaucicolella
		Coleophora helichrysiella
		Coleophora involucrella
		Coleophora lineata
		Coleophora medelichensis
		Coleophora ochrea
		Coleophora oriolella
		Coleophora santolinella
		Coleophora sisteronica
		Coleophora sp.
		Coleophora staehelinella
		Coleophora striolatella
		Coleophora trigeminella
		Coleophora vestianella
		Coleophora wockeella
	Cosmopterigidae	Limnaecia phragmitella
		Pyroderces argyrogrammos
	Crambidae	Agriphila geniculea
		Agriphila sp.
		Catoptria pinella
		Eudonia lacustrata
		Eudonia mercurella
		Eudonia petrophila
		Metasia ophialis
		Pediasia aridella
		Pediasia contaminella
		Pyrausta despicata
		Udea ferrugalis*
	Depressariidae	Agonopterix cnicella
		Agonopterix heracliana
		Agonopterix nervosa
		Agonopterix scopariella
		Agonopterix sp.
		Agonopterix subpropinquella
		Depressaria albipunctella
		Depressaria sp.
		Luquetia lobella
	Elachistidae	Elachista argentella
		Elachista nr. collitella
		Elachista nuraghella
		Elachista sp.
		Haplochrois buvati
		Heinemannia festivella
	Epermeniidae	Epermenia pontificella
		Ochromolopis ictella
	Erebidae	Calliteara pudibunda*
		Coscinia cribraria
		Cymbalophora pudica
		Eublemma purpurina
		Lygephila sp.
		Ocneria rubea
	Gelechiidae	Aproaerema anthyllidella
		Aroga pascuicola
		Acompsia cinerella
		Anacampsis populella*
		Aproaerema anthyllidella
		Aproaerema patruella
		Aproaerema suecicella
		Aristotelia sp.
		Bryotropha terrella
		Bryotropha vondermuhlli
		Dichomeris alacella
		Epidola stigma
		Eulamprotes immaculatella
		Exoteleia dodecella**
		Gelechia basipunctella
		Gelechia sabinella
		Gelechia scotinella
		Gelechia turpella
		Helcystogramma lutatella
		Isophrictis kefersteiniellus
		Isophrictis lineatella
		Megacraspedus lanceolellus
		Megacraspedus quadristictus
		Mesophleps corsicella
		Mesophleps ochracella
		Mesophleps oxycedrella
		Metzneria aestivella
		Metzneria hilarella
		Metzneria metzneriella
		Metzneria neuropterella
		Mirificarma mulinella
		Neofaculta ericetella
		Nothris verbascella
		Phthorimaea operculella**
		Ptocheuusa inopella
		Ptocheuusa paupella
		Recurvaria leucatella*
		Recurvaria nanella**
		Scrobipalpa acuminatella
		Scrobipalpa costella
		Scrobipalpa obsoletella
		Scrobipalpa portosanctana
		Scrobipalpa sp.
		Scrobipalpa suaedivorella
		Scrobipalpa vasconiella
		Sophronia humerella
		Telphusa cistiflorella
		Xenolechia aethiops
	Geometridae	Aspitates gilvaria
		Aspitates ochrearia
		Calamodes occitanaria
		Camptogramma bilineata
		Charissa obscurata
		Charissa sp.
		Compsoptera jourdanaria
		Compsoptera opacaria
		Crocallis dardoinaria
		Cyclophora sp.
		Gnophos dumetata
		Hospitalia flavolineata
		Idaea consanguiberica
		Idaea fuscovenosa
		Idaea infirmaria
		Idaea laevigata
		Idaea mustelata
		Idaea ostrinaria
		Idaea sp.
		Isturgia murinaria
		Pachycnemia hippocastanaria
		Pachycnemia tibiaria
		Peribatodes sp.
		Rhodometra sacraria
		Scopula submutata
		Scotopteryx peribolataJG01Mo
		Selidosema pyrenaearia
		Selidosema taeniolaria
		Stegania sp.
		Xanthorhoe ferrugata
		Zernyia granataria
	Glyphipterigidae	Orthotelia sparganella
	Gracillaridae	Parornix atripalpella
		Parornix devoniella*
		Parornix szocsi
		Phyllonorycter endryella
		Phyllonorycter messaniella*
		Phyllonorycter populifoliella
		Phyllonorycter sp.
	Hepialidae	Triodia sylvina
	Lasiocampidae	Lasiocampa trifolii
	Lecithoceridae	Eurodachtha canigella
		Eurodachtha pallicornella
		Homaloxestis briantiella
	Limnephilidae	Glyphotaelius pellucidus
	Lypusidae	Pseudatemelia flavifrontella
	Momphidae	Mompha epilobiella
		Mompha subbistrigella
	Nepticulidae	Stigmella eberhardi
		Stigmella sp.
	Noctuidae	Agrotis sp.
		Agrotis trux
		Euxoa sp.
		Hadena luteocincta
		Hoplodrina octogenaria
		Lycophotia erythrina
		Mythimna unipuncta**
		Noctua sp.
		Peridroma saucia**
		Raphia hybris
		Spodoptera exigua**
		Stilbia andalusiaca
		Thalpophila sp.
		Xestia xanthographa
	Notodontidae	Thaumetopoea pityocampa**
	Nymphalidae	Pyronia tithonus
	Oecophoridae	Batia lunaris
		Crassa unitella
		Pleurota aristella
		Pleurota honorella
	Oeocophoridae	Oecophora bractella*
	Plutellidae	Plutella xylostella**
	Praydidae	Prays oleae**
		Prays sp.
	Psychidae	Eumasia parietariella
	Pterophoridae	Agdistis sp.
		Amblyptilia acanthadactyla
		Calyciphora adamas
		Cnaemidophorus rhododactyla
		Emmelina monodactyla
		Merrifieldia baliodactylus
		Merrifieldia garrigae
		Pterophorus pentadactyla
		Stenoptilia mariaeluisae
		Stenoptilia mimula
		Stenoptilia sp.
		Stenoptilia zophodactyla
		Wheeleria spilodactylus
	Pyralidae	Acrobasis advenella
		Acrobasis marmorea
		Acrobasis porphyrella
		Actenia borgialis
		Ancylosis oblitella
		Asalebria florella
		Ematheudes punctellus
		Endotricha flammealis
		Ephestia parasitella**
		Ephestia sp.
		Homoeosoma sinuella
		Oxybia transversella
		Phycita sp.
		Phycitodes saxicola
		Synaphe punctalis
	Scythrididae	Scythris sp.
	Tineidae	Ateliotum petrinella
		Infurcitinea atrifasciella
		Monopis crocicapitella
		Morophaga choragella
		Nemapogon nevadella
		Nemapogon peslieri
		Nemapogon ruricolella
		Tenaga rhenania
	Tischeriidae	Coptotriche angusticollella
		Coptotriche marginea
		Tischeria ekebladella*
	Tortricidae	Acleris forsskaleana
		Acleris schalleriana*
		Acleris variegana**
		Aethes bilbaensis
		Aethes sp.
		Aethes williana
		Agapeta sp.
		Aleimma loeflingiana*
		Ancylis achatana*
		Archips podana**
		Archips rosana*
		Clepsis consimilana*
		Cnephasia incertana*
		Cnephasia sp.
		Cochylimorpha meridiana
		Cochylis hybridella
		Cochylis molliculana
		Cochylis posterana
		Crocidosema plebejana
		Cydia amplana
		Cydia coniferana
		Cydia fagiglandana*
		Cydia intexta
		Cydia pomonella**
		Cydia sp.
		Cydia splendana*
		Diceratura infantana
		Ditula angustiorana*
		Endothenis sp.
		Epinotia nisella
		Epinotia ramella
		Epinotia tenerana
		Epinotia thapsiana
		Eucosma balatonana
		Eucosma cana
		Gypsonoma aceriana**
		Gypsonoma sociana
		Hedya nubiferana*
		Hedya ochroleucana*
		Hedya pruniana*
		Hedya sp.
		Isotrias stramentana
		Lobesia botrana**
		Lozotaenia cupididana
		Neosphaleroptera nubilana*
		Notocelia incarnatana
		Notocelia roborana
		Notocelia uddmanniana**
		Orthotaenia undulana*
		Paramesia gnomana
		Pelochrista mollitana
		Pelochrista sp.
		Phalonidia contractana
		Pseudargyrotoza conwagana
		Rhyacionia buoliana**
		Rhyacionia pinicolana*
		Sparganothis pilleriana**
		Spilonota ocellana*
		Zeiraphera isertana
	Yponomeutidae	Cedestis subfasciella
		Paraswammerdamia albicapitella
	Ypsolophidae	Ypsolopha scabrella*
Neuroptera	Chrysopidae	Chrysopa dorsalis
		Chrysopa viridana
		Chrysoperla sp.
		Nothochrysa capitata
		Pseudomallada sp.
	Hemerobiidae	Sympherobius klapaleki
		Hemerobius humulinus
		Hemerobius lutescens
		Hemerobius micans
		Hemerobius sp.
		Sympherobius klapaleki
		Sympherobius pygmaeus
		Wesmaelius sp.
Plecoptera	Leuctridae	Leuctra sp.
	Nemouridae	Protonemura nitida
Trichoptera	Hydropsychidae	Hydropsyche bulbifera
		Hydropsyche dinarica
		Hydropsyche exocellata
		Hydropsyche siltalai
	Hydroptilidae	Hydroptila angulata
	Lepidostomatidae	Lepidostoma hirtum
	Limnephilidae	Limnephilus hirsutus
		Potamophylax latipennis
	Odontoceridae	Odontocerum albicorne
	Psychomyiidae	Psychomyia pusilla
		Psychomyia sp.
	Rhyacophilidae	Rhyacophila sp.
	* Minor pest species
	** Major pest species
List of non-prey species
Order	Family	Species
Chiroptera	Rhinolophidae	Rhinolophus hipposideros
Eurotiales	Trichocomaceae	Penicillium brevicompactum
Ixodida	Argasidae	Carios vespertilionis
Mesostigmata	Melicharidae	Proctolaelaps scolyti
Mucorales	Lichtheimiaceae	Lichtheimia ramosa
Rickettsiales	Rickettsiaceae	Wolbachia sp.
Rodentia	Muridae	Rattus sp.
Sarcoptiformes	Micreremidae	Micreremus brevipes
Trombidiformes	Unionicolidae	Unionicola sp.
